# Supplementary material
Source: PubMed Central journal article supplement (PMC3012152)

Fig. S1

Consecutive replicates of the protonated reserpine ion peak measured at {DV = 4 kV; 75% He} using  $Q = 0.7$  L/min (half of the 24-peak sequence is shown).

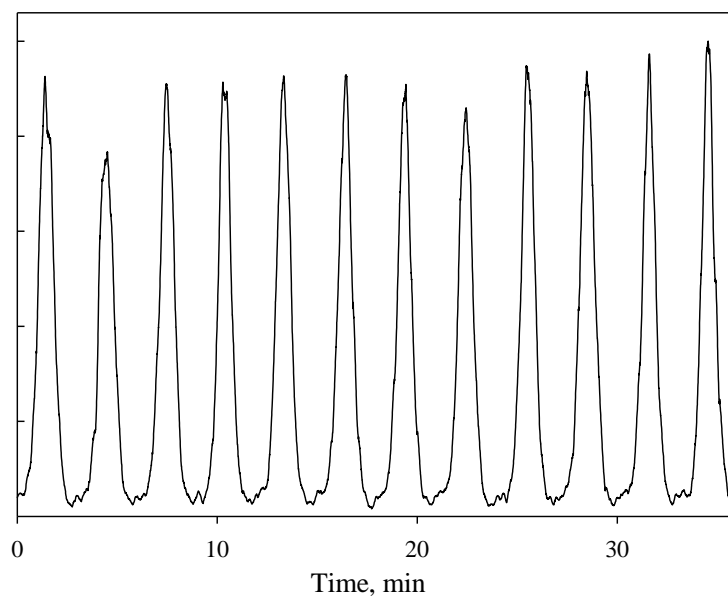

Fig. S2

Consecutive replicates of the peaks for 3+ ions of Syntide 2 measured using  $Q = 0.8$  L/min: (a, b) the high- $E_C$  peak at (a) {DV = 5.4 kV; 50% He} and (b) {DV = 4 kV; 75% He}; (c) the low- $E_C$  peak under the conditions (b).

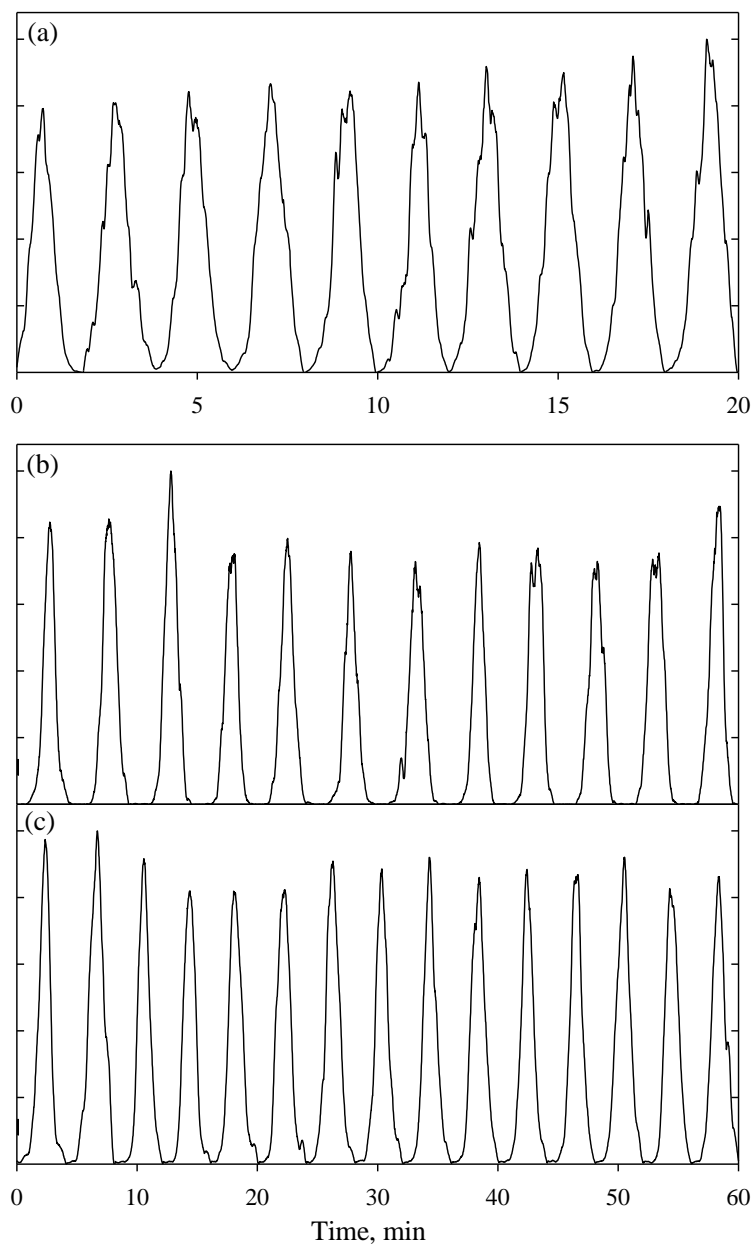

Supplement: NIHMS255582-supplement-1_si_001.pdf [file NIHMS255582-supplement-1_si_001.pdf]
